# Supplementary material for: Glucosinolate Bioactivation by Apis mellifera Workers and Its Impact on Nosema ceranae Infection at the Colony Level
Source: MDPI journal article supplement (doi:10.3390/biom11111657), 2021-11-08
Supplement: s1 [file s1]

## Supplementary Materials

**Table S1.** Number of brood cells and adult bees registered pre- and post-treatment in the colonies (number ID) of the three groups (R: *E. sativa*, N: *B. nigra*, CTRL–: negative control). Raw data of Figure 2.

| Column<br>Number ID | Treatment<br>Groups | Brood<br>PRE | Brood<br>POST | Adult<br>PRE | Adult<br>POST |
|---------------------|---------------------|--------------|---------------|--------------|---------------|
| 108                 | R                   | 47,625       | 52,125        | 23,875       | 26,000        |
| 124                 | R                   | 46,875       | 39,750        | 28,375       | 27,750        |
| 125                 | R                   | 51,000       | 54,375        | 16,125       | 21,375        |
| 131                 | R                   | 47,250       | 25,125        | 21,750       | 24,125        |
| 132                 | R                   | 6750         | 40,500        | 17,000       | 23,625        |
| 101                 | N                   | 52,500       | 48,750        | 27,375       | 27,875        |
| 116                 | N                   | 35,250       | 41,250        | 21,250       | 25,625        |
| 119                 | N                   | 52,125       | 43,500        | 23,875       | 26,500        |
| 121                 | N                   | 46,500       | 46,125        | 21,875       | 27,750        |
| 130                 | N                   | 47,250       | 45,375        | 18,375       | 23,625        |
| 107                 | CTRL–               | 52,125       | 45,000        | 26,875       | 30,250        |
| 112                 | CTRL–               | 45,000       | 47,250        | 21,875       | 28,125        |
| 122                 | CTRL–               | 51,000       | 34,875        | 23,000       | 27,000        |
| 123                 | CTRL–               | 49,500       | 58,500        | 25,125       | 23,375        |
| 127                 | CTRL–               | 41,250       | 43,500        | 13,750       | 18,875        |
